# Supplementary figures and images for: Allostatic load as predictor of mortality: a cohort study from Lolland-Falster, Denmark
Source: HighWire-hosted journal article supplement (doi:10.1136/bmjopen-2021-057136), 2022-05-01

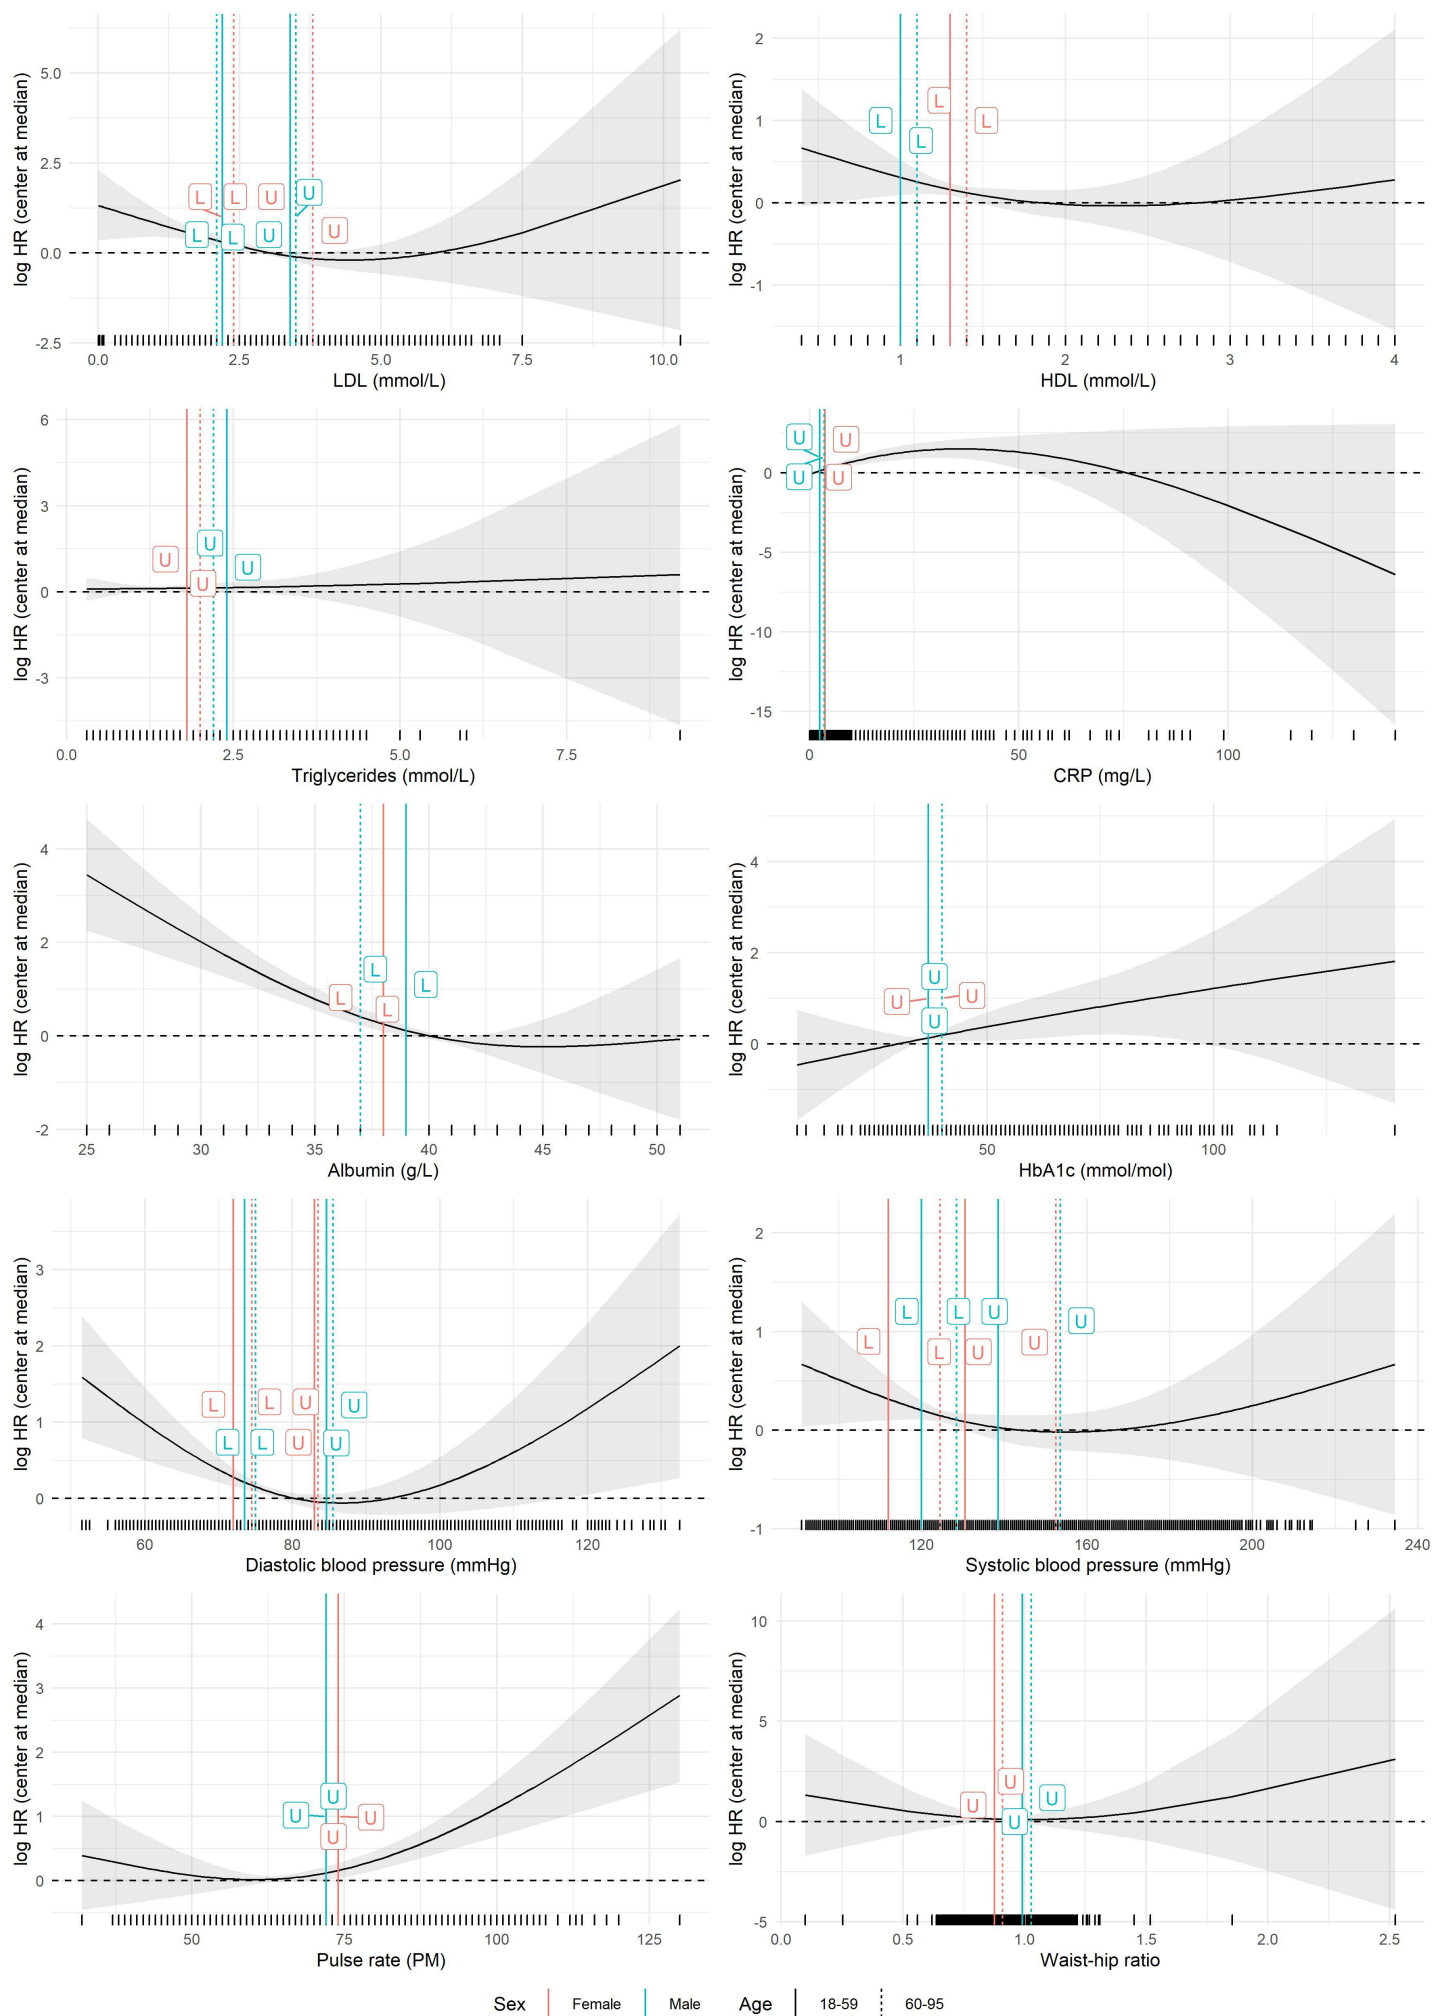

Supplement: bmjopen-2021-057136supp001_data_supplement.pdf [file bmjopen-2021-057136supp001_data_supplement.pdf]
